# Supplementary material for: Identification of the key differentially expressed genes and pathways involved in neutrophilia
Source: PubMed Central journal article supplement — Innate Immun. 2019 Nov 15;26(4):270–84. doi: 10.1177/1753425919887411 (PMC7251796; doi:10.1177/1753425919887411), 2019-11-15
Supplement: INI887411_Supplementary_material1.pdf [file INI887411_Supplementary_material1.pdf]

**Table S3.** The logFC and *P* values of the top-10 hub genes in Table 4 (gene names are shown in alphabetical order).

| Gene name      | GSE64457     |                 | GSE94923     |                 | GSE54644     |                 |
|----------------|--------------|-----------------|--------------|-----------------|--------------|-----------------|
|                | logFC        | <i>P</i> .Value | logFC        | <i>P</i> .Value | logFC        | <i>P</i> .Value |
| <i>AKT1</i>    | -1.09157945  | 3.00001E-06     | -1.340208995 | 0.000156043     | /            | /               |
| <i>ARRB1</i>   | -1.048969405 | 0.000563156     | -1.307891053 | 0.000376162     | /            | /               |
| <i>BCLAF1</i>  | -1.00729589  | 0.000105451     | -1.118023129 | 0.002118514     | /            | /               |
| <i>CD44</i>    | 1.500653289  | 9.44395E-07     | 3.017249872  | 5.14563E-06     | 2.058151432  | 4.07633E-08     |
| <i>CNOT6L</i>  | -1.088168944 | 0.000596376     | -1.445011369 | 1.01106E-06     | /            | /               |
| <i>COPS3</i>   | /            | /               | -1.840553127 | 1.01204E-05     | -1.115527891 | 0.000250387     |
| <i>DCUNID1</i> | -1.42547477  | 1.50015E-06     | -1.070944947 | 1.79528E-05     | /            | /               |
| <i>EGR1</i>    | 2.300283123  | 0.001095827     | 1.148482542  | 0.001235721     | -1.70326189  | 0.000699864     |
| <i>ENO1</i>    | 1.788314066  | 1.1526E-06      | /            | /               | 1.254058478  | 4.74307E-05     |
| <i>GAB1</i>    | -1.065049085 | 0.000118759     | -1.125324394 | 0.000377306     | /            | /               |
| <i>IL18R1</i>  | 2.276337869  | 1.49038E-05     | 2.61008553   | 3.21221E-08     | 2.572196356  | 6.1491E-07      |
| <i>IL18RAP</i> | 1.662360962  | 8.32132E-06     | 1.846201435  | 5.31286E-05     | 1.269589903  | 0.005001955     |
| <i>IL1R2</i>   | 1.673392393  | 0.000181569     | 2.455347111  | 3.95095E-05     | /            | /               |
| <i>IL6ST</i>   | 1.20742291   | 0.000209031     | 1.215195102  | 9.58201E-06     | 1.422147141  | 2.19772E-06     |
| <i>IRAK3</i>   | 2.158101297  | 6.6267E-09      | /            | /               | 2.42281056   | 4.5592E-06      |
| <i>JAK1</i>    | -1.318171001 | 4.7373E-05      | -1.159947381 | 0.000734786     | /            | /               |
| <i>LDLR</i>    | 1.977765462  | 1.30354E-05     | 1.283995725  | 4.53534E-06     | 1.379985561  | 0.001687981     |
| <i>LIMS1</i>   | /            | /               | 1.304296262  | 0.001667869     | 1.210638216  | 1.82641E-05     |
| <i>MAP2K6</i>  | 1.795054232  | 1.98518E-06     | /            | /               | 1.26453289   | 0.003481611     |
| <i>MAPK14</i>  | 1.139882546  | 6.86503E-06     | /            | /               | 2.433730263  | 3.26493E-10     |
| <i>MED25</i>   | -1.342584964 | 1.87399E-06     | -1.422348468 | 1.2467E-05      | /            | /               |
| <i>MEF2A</i>   | 1.51688291   | 5.68835E-06     | /            | /               | 2.340185545  | 8.55178E-09     |
| <i>PKM</i>     | 2.104514339  | 9.97644E-07     | /            | /               | 1.699771195  | 8.23074E-07     |
| <i>PKN2</i>    | -1.02997132  | 3.91048E-06     | -1.066135156 | 0.001748026     | 1.010578211  | 0.000224115     |
| <i>POR</i>     | 1.076290057  | 3.44871E-05     | /            | /               | 1.477873249  | 2.51118E-05     |
| <i>PRKAG2</i>  | -1.149018649 | 0.000264424     | -1.408206768 | 0.000303062     | /            | /               |
| <i>PRKCE</i>   | 1.683147851  | 9.19702E-05     | /            | /               | 1.250365546  | 0.000125438     |
| <i>TLR4</i>    | /            | /               | 1.446613491  | 0.000346521     | 1.257533946  | 0.00085127      |
